# Supplementary material
Source: PubMed Central journal article supplement (PMC7609304)
Supplement: 41380_2016_BFmp201691_MOESM488_ESM.pdf [file 41380_2016_BFmp201691_MOESM488_ESM.pdf]

# Supplementary Table 1

|                                        | n  | Membrane resistance (M $\Omega$ ) | Membrane capacitance (pF) | Resting membrane potential (mV) | AP threshold (mV) | AP peak amplitude (mV) | AP antipeak amplitude (mV) | AP half-width (ms) |
|----------------------------------------|----|-----------------------------------|---------------------------|---------------------------------|-------------------|------------------------|----------------------------|--------------------|
| <b>Naïve Arc-dVenus<sup>+</sup></b>    | 15 | 290.5 $\pm$ 61.7                  | 53.1 $\pm$ 5.8            | -59.5 $\pm$ 0.9                 | -35.2 $\pm$ 1.4   | 71.0 $\pm$ 3.1         | -21.4 $\pm$ 1.4            | 1.29 $\pm$ 0.02    |
| <b>Naïve Arc-dVenus<sup>-</sup></b>    | 16 | 225.1 $\pm$ 18.8                  | 54.4 $\pm$ 5.0            | -63.3 $\pm$ 2.0                 | -35.8 $\pm$ 1.1   | 75.1 $\pm$ 3.0         | -19.6 $\pm$ 1.3            | 1.32 $\pm$ 0.03    |
| <b>Unpaired Arc-dVenus<sup>+</sup></b> | 16 | 216.0 $\pm$ 15.4                  | 55.0 $\pm$ 3.6            | -63.9 $\pm$ 1.5                 | -31.4 $\pm$ 1.3   | 64.5 $\pm$ 3.0         | -21.9 $\pm$ 1.1            | 1.33 $\pm$ 0.03    |
| <b>Unpaired Arc-dVenus<sup>-</sup></b> | 17 | 232.1 $\pm$ 17.4                  | 61.0 $\pm$ 6.1            | -64.1 $\pm$ 1.2                 | -30.5 $\pm$ 1.3   | 66.7 $\pm$ 2.6         | -22.0 $\pm$ 1.1            | 1.32 $\pm$ 0.02    |
| <b>Paired Arc-dVenus<sup>+</sup></b>   | 16 | 190.7 $\pm$ 7.2                   | 61.6 $\pm$ 5.4            | -65.4 $\pm$ 1.2                 | -30.2 $\pm$ 1.4   | 66.0 $\pm$ 2.7         | -24.8 $\pm$ 1.0            | 1.21 $\pm$ 0.03    |
| <b>Paired Arc-dVenus<sup>-</sup></b>   | 18 | 213.5 $\pm$ 12.5                  | 55.1 $\pm$ 2.6            | -62.4 $\pm$ 1.2                 | -30.5 $\pm$ 1.6   | 70.1 $\pm$ 1.7         | -22.5 $\pm$ 1.2            | 1.25 $\pm$ 0.03    |
